# Supplementary material
Source: publisher site journal article supplement (https://www.spandidos-publications.com/6037/downloadSupplementary)
Supplement: Supplementary file 1 [file downloadSupplementary]

## Sheet: Table SII
Table SII. Sample ID used in the present study from TCGA database.
TCGA patient ID	CYTH4	Group
3012	1.14937	Low
2980	1.43699	Low
2897	1.74715	Low
2872	2.01522	Low
2991	2.01904	Low
3007	2.12033	Low
2950	2.1656	Low
2886	2.37937	Low
2841	2.51058	Low
2998	2.5151	Low
2862	2.71237	Low
2863	2.79843	Low
2858	2.81343	Low
2806	3.06973	Low
2999	3.15984	Low
2819	3.2201	Low
2840	3.46948	Low
2823	3.6794	Low
2812	3.94486	Low
2877	4.59827	Low
2982	4.68178	Low
2878	4.73611	Low
3001	4.92383	Low
2919	5.7356	Low
2941	5.90907	Low
2938	6.06858	Low
2901	6.24555	Low
2913	6.52286	Low
2875	6.5306	Low
2937	6.57426	Low
2869	6.70659	Low
2874	6.89682	Low
2984	7.01479	Low
2995	7.17447	Low
2976	7.95003	High
2986	8.07238	High
2822	8.0813	High
2996	8.15763	High
2853	8.24007	High
2963	8.30032	High
2867	8.43627	High
2994	9.23911	High
2975	9.47199	High
2965	9.94521	High
2910	10.2807	High
2849	10.3126	High
2844	10.9038	High
2966	11.0998	High
2898	11.5566	High
2842	11.6622	High
2821	11.8824	High
2871	12.2008	High
2857	12.5277	High
2992	13.2601	High
2883	13.6896	High
2912	13.9765	High
2931	14.6041	High
2895	14.6186	High
2914	14.8089	High
2893	15.6365	High
2917	15.7113	High
2834	15.7818	High
2808	16.3437	High
2847	16.843	High
2861	16.9634	High
2889	17.4152	High
2925	17.5127	High
2818	17.9248	High
2856	18.9633	High
2944	19.1076	High
2873	19.1896	High
2988	19.367	High
2892	19.426	High
3009	19.4326	High
2928	19.4484	High
2828	19.4744	High
2921	19.7743	High
2846	19.8997	High
2859	20.1303	High
2884	20.2846	High
2876	20.3131	High
2956	21.2812	High
2990	21.2827	High
2942	21.5452	High
2882	22.1056	High
2948	22.1202	High
2839	22.3663	High
2814	23.1427	High
2896	23.2661	High
3002	23.6076	High
2810	23.6468	High
2930	23.6813	High
2940	24.1411	High
2971	25.0795	High
2918	25.518	High
2977	25.5316	High
2924	26.4442	High
2825	26.8477	High
2805	27.4729	High
2881	27.5192	High
2813	27.5221	High
2946	27.5568	High
2880	28.1517	High
2815	28.2044	High
2891	29.1637	High
2845	29.8404	High
2835	29.9155	High
2826	30.24	High
2900	30.2862	High
2935	30.9591	High
2959	31.0538	High
2949	32.2735	High
2915	32.8566	High
2830	33.1974	High
3008	33.5555	High
2955	34.0935	High
3011	35.263	High
2933	35.3959	High
2908	36.2468	High
2936	36.5311	High
2983	36.5506	High
2866	36.8027	High
3000	37.5528	High
2870	38.2849	High
2817	39.7512	High
2865	39.8641	High
2979	39.9107	High
2920	40.2661	High
2929	40.4088	High
2894	40.5719	High
2973	40.8926	High
2911	41.5718	High
2836	42.5289	High
2888	42.5782	High
2970	42.6661	High
2987	43.166	High
2851	44.3823	High
2916	45.5324	High
2932	45.924	High
2934	47.0415	High
2885	47.6123	High
2952	47.918	High
2939	49.4813	High
2981	49.9841	High
2843	52.2761	High
2890	54.6766	High
2943	56.6161	High
2899	66.7581	High
2927	67.0658	High
2820	77.8133	High
2811	79.3038	High
CYTH4, cytohesin 4; TCGA, The Cancer Genome Atlas.
